# Supplementary material
Source: publisher figshare collection journal article supplement (https://acs.figshare.com/ndownloader/files/5277799)
Supplement: Supplementary file 1 [file 5277799]

## Supporting Information

### An *in-situ* potential-enhanced ion transport system based on FeHCF-PPy/PSS membrane for the removals of $\text{Ca}^{2+}$ and $\text{Mg}^{2+}$ from dilute aqueous solution

Pengle Zhang<sup>a</sup>, Junlan Zheng<sup>a</sup>, Zhongde Wang<sup>a</sup>, Xiao Du<sup>a</sup>, Fengfeng Gao<sup>a</sup>, Xiaogang Hao<sup>a\*</sup>, Guoqing Guan<sup>b</sup>, Chuncheng Li<sup>a</sup>, Shibin Liu<sup>a</sup>

<sup>a</sup> Department of Chemical Engineering, Taiyuan University of Technology, Taiyuan 030024, China

<sup>b</sup> North Japan Research Institute for Sustainable Energy (NJRISE), Hirosaki University, 2-1-3, Matsubara, Aomori 030-0813, Japan

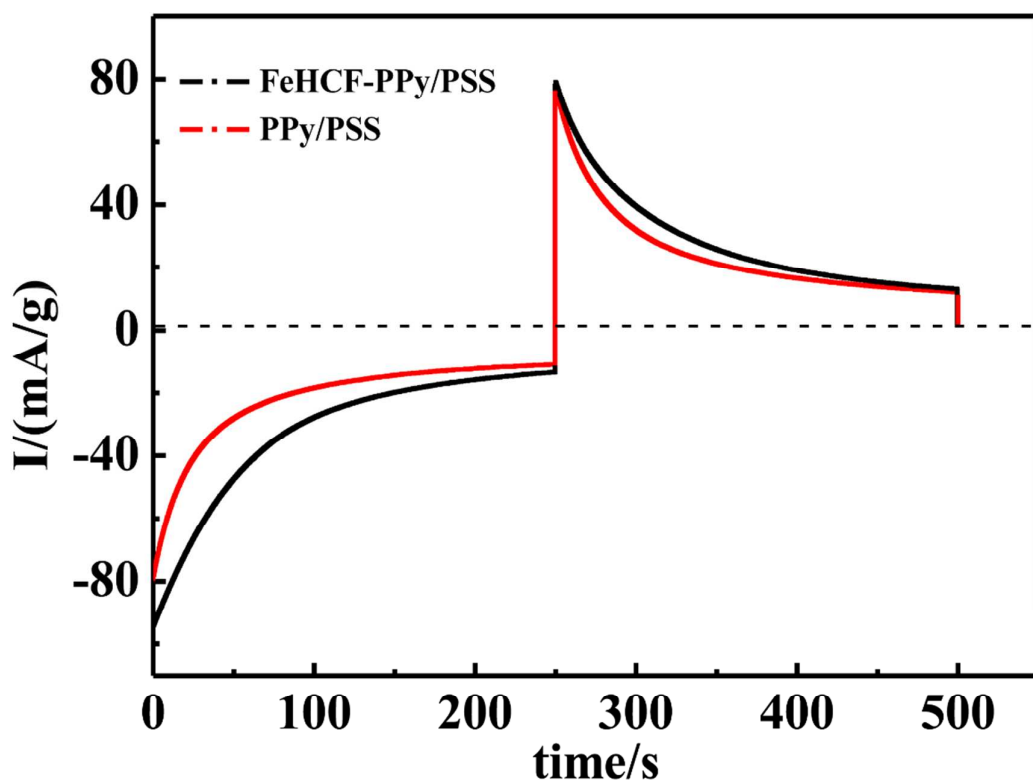

**Fig. S1** Current-time curves of FeHCF-PPy/PSS and PPy/PSS membranes (electrodeposited PPy/PSS for 1 h) between -1 V reduced state and 1 V oxidized state in 0.1 M  $\text{KNO}_3$

\*Corresponding author. E-mail address: xghao@tyut.edu.cn (X. Hao).

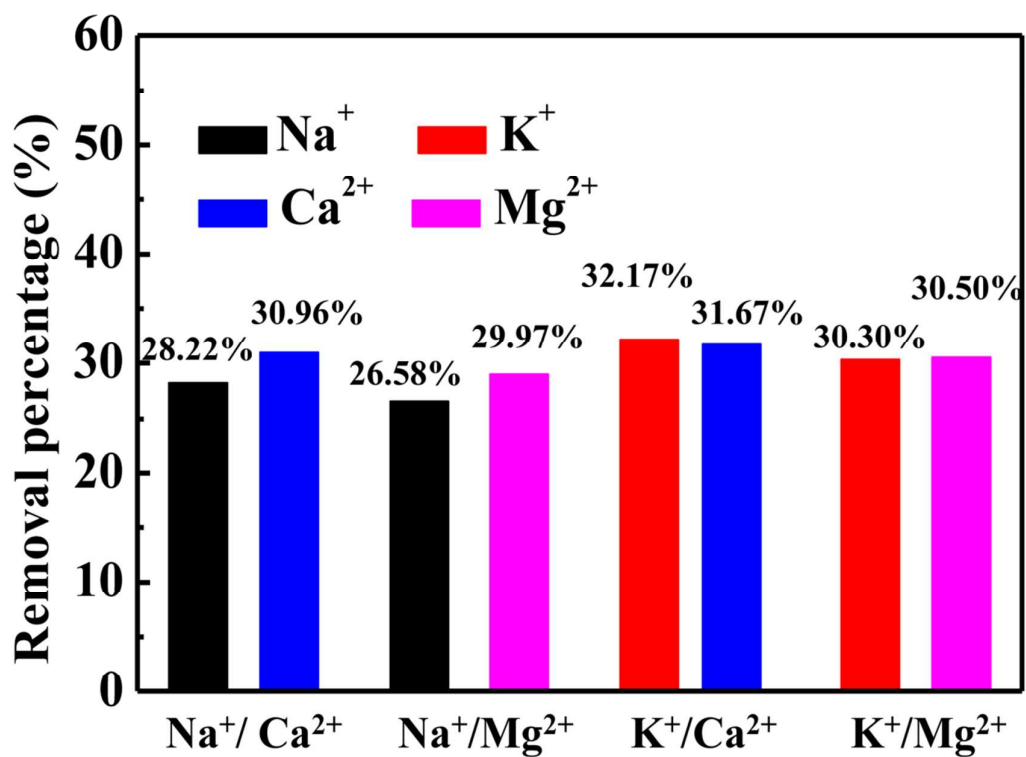

**Fig. S2** Removal percentages of Ca<sup>2+</sup>, Mg<sup>2+</sup>, Na<sup>+</sup> and K<sup>+</sup> of the binary solutions of Ca(NO<sub>3</sub>)<sub>2</sub>/NaNO<sub>3</sub>, Ca(NO<sub>3</sub>)<sub>2</sub>/KNO<sub>3</sub>, Mg(NO<sub>3</sub>)<sub>2</sub>/NaNO<sub>3</sub> and Mg(NO<sub>3</sub>)<sub>2</sub>/KNO<sub>3</sub> with pulse potential (-1 V to 1 V, pulse width: 60 s) and 5 V cell voltage for 5 h.
